# Supplementary material for: Hierarchical biofilm models using sodium alginate beads containing bacteria embedded in a cellulose–chitosan hydrogel matrix
Source: Royal Society of Chemistry journal article supplement (doi:10.1039/d4tb02015d), 2025-01-01
Supplement: d4tb02015d2.pdf [file d4tb02015d2.pdf]

## Supplementary data

Supplementary Table 1. Comparison of crosslink stability among SA hydrogel beads,

|                            | Degradation time | Composition                                               | Reference                   |
|----------------------------|------------------|-----------------------------------------------------------|-----------------------------|
| SA hydrogel beads          | 1-3 days         | Sodium alginate and calcium chloride                      | (Moya, Morley et al. 2012)  |
| Chitosan-based hydrogel    | Days to weeks    | Chitosan, carboxymethyl cellulose                         | (Ciolacu, Nicu et al. 2020) |
| Beads-in-hydrogel platform | At least 13 days | Sodium alginate, calcium chloride, chitosan and cellulose | This work                   |

Chitosan-based hydrogel, and the beads-in-hydrogel platform.

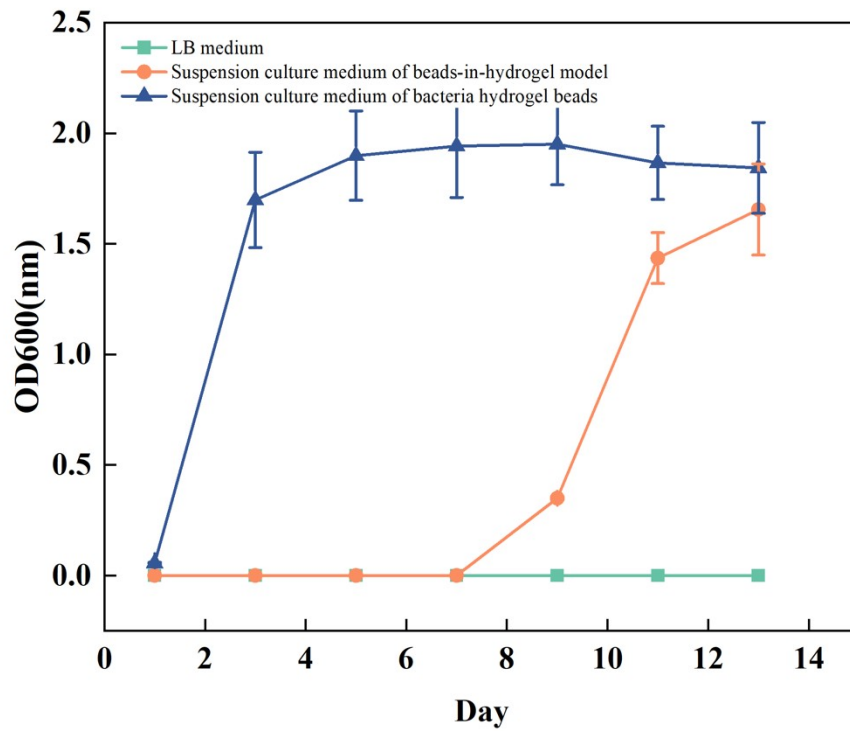

Figure S1. OD absorbance assay measuring the optical density (OD) of 200  $\mu$ L samples from pure LB medium, suspension medium extracted from the bacterial beads model, and the beads-in-hydrogel model culture. Measurements were taken on days 1, 3, 5, 7, 9, 11, and 13. The OD value of our beads-in-hydrogel suspension (orange line) began increasing on day 7, whereas the bacterial hydrogel bead suspension showed an OD increase as early as day 3. This indicates that our beads-in-hydrogel platform has significantly enhanced stability compared to SA hydrogel alone.

#### Reference:

1. Ciolacu, D. E., R. Nicu and F. Ciolacu (2020). "Cellulose-Based Hydrogels as Sustained Drug-Delivery Systems." Materials **13**(22): 5270.
2. Moya, M. L., M. Morley, O. Khanna, E. C. Opara and E. M. Brey (2012). "Stability of alginate microbead properties in vitro." J Mater Sci Mater Med **23**(4): 903-912.
