# Supplementary figures and images for: Hierarchical biofilm models using sodium alginate beads containing bacteria embedded in a cellulose–chitosan hydrogel matrix
Source: Royal Society of Chemistry journal article supplement (doi:10.1039/d4tb02015d), 2025-01-01

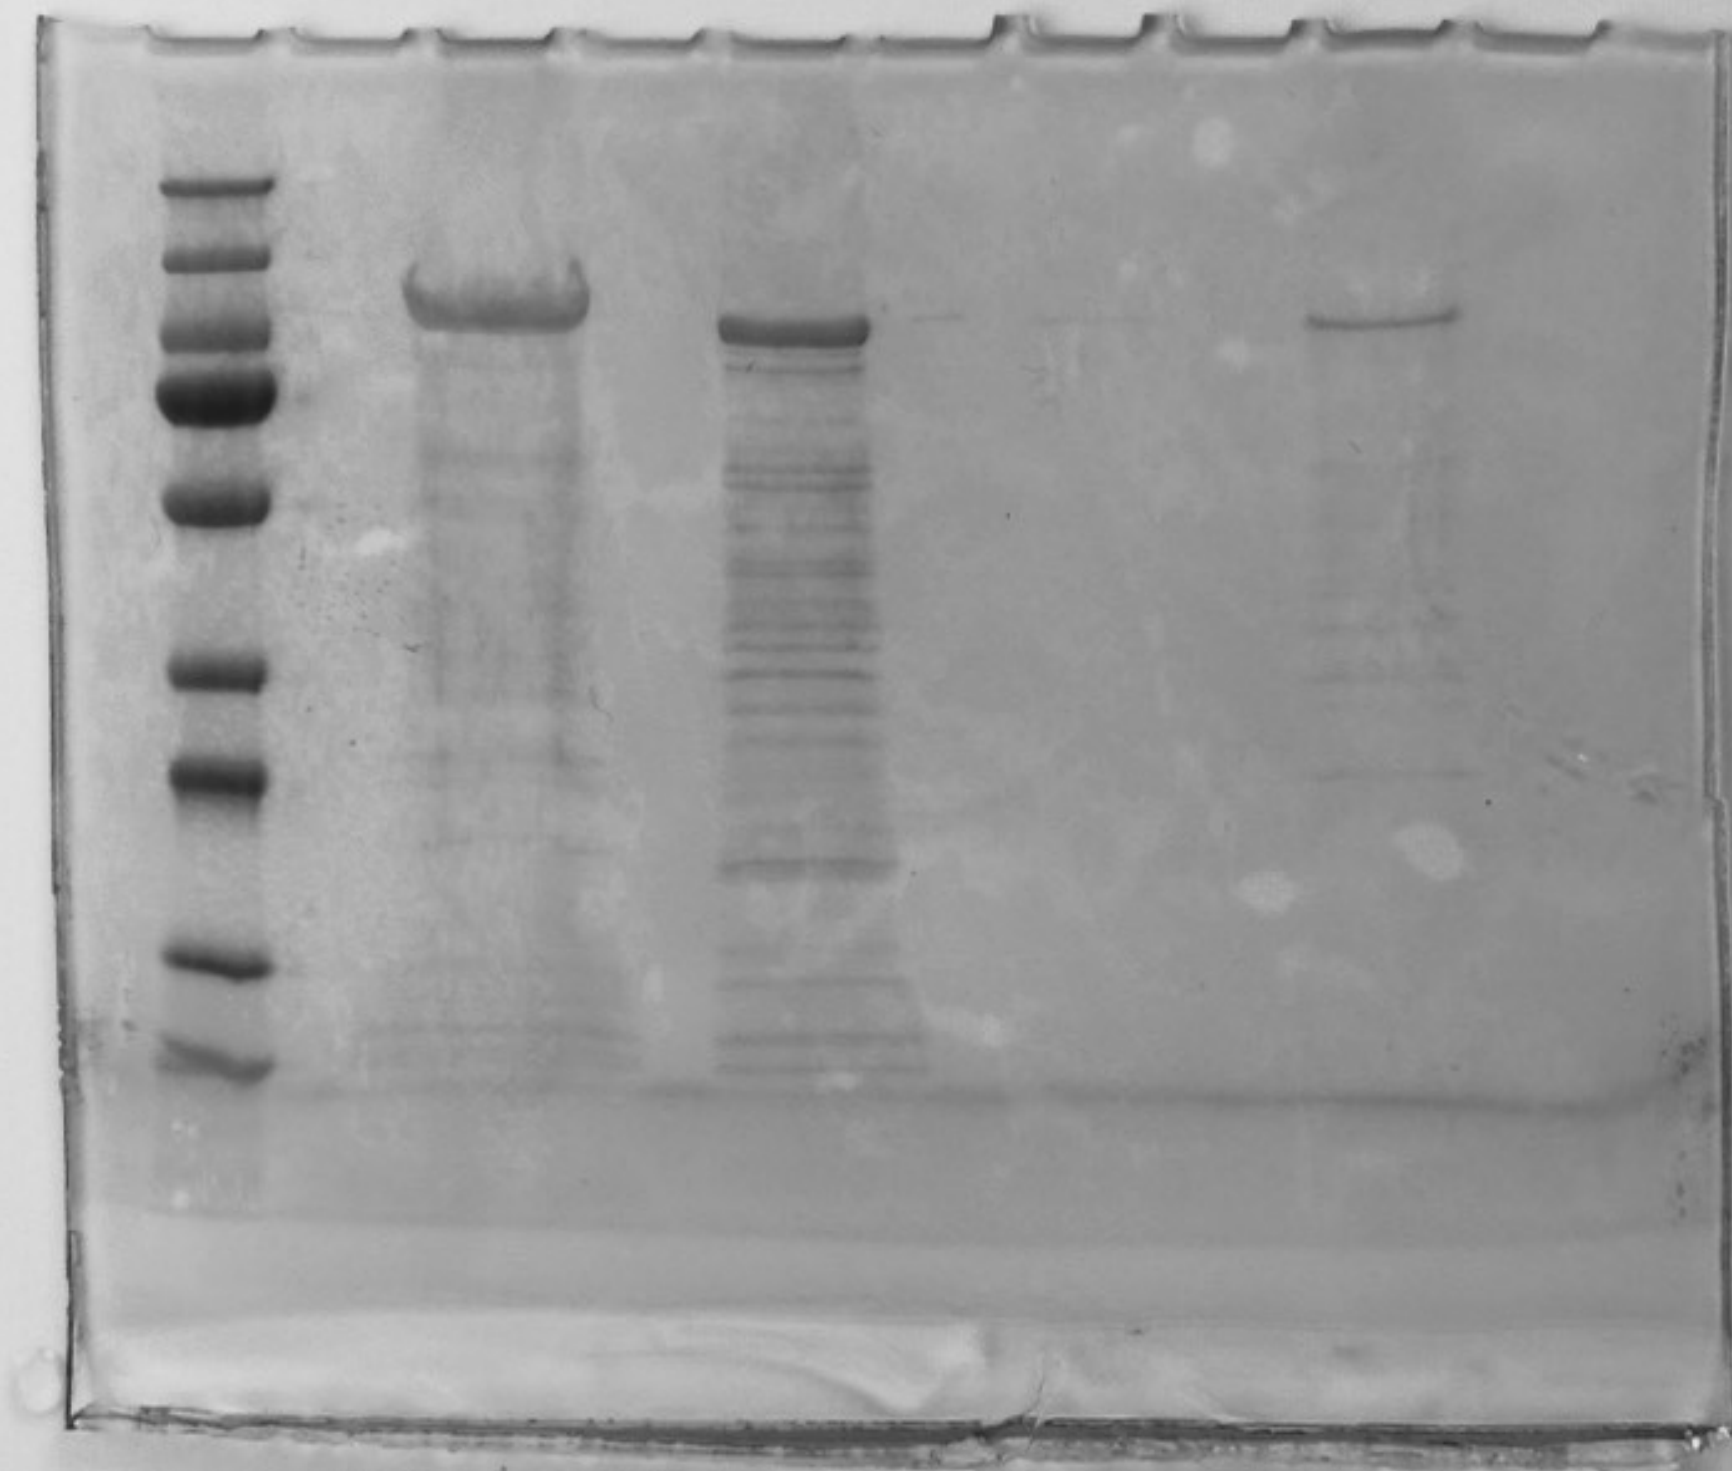

Supplement: d4tb02015d1.pdf [file d4tb02015d1.pdf]
